# Supplementary material
Source: Royal Society of Chemistry journal article supplement (doi:10.1039/d6fo00785f)

*Supplementary Information*

**Fucoidan Alleviates Kidney Fibrosis by Shaping the Gut Microbiota and Modulating Tryptophan Metabolism**

Ying Zhang<sup>1,2#</sup>, Jinxin Li<sup>2#</sup>, Wanting Chen<sup>3</sup>, Fengxia Qin<sup>1</sup>, Yuan Tian<sup>2</sup>, Zunjian Zhang<sup>3</sup>,  
Fengguo Xu<sup>1,2,3\*</sup>, Pei Zhang<sup>1,2,3\*</sup>

<sup>1</sup> Affiliated Jiangning Hospital of Chinese Medicine, China Pharmaceutical University, Nanjing, 211100, China

<sup>2</sup> School of Pharmacy, China Pharmaceutical University, Nanjing, 210009, China

<sup>3</sup> State Key Laboratory of Natural Medicines, China Pharmaceutical University, Nanjing, 210009, China

# These authors contributed equally to this work.

\* Correspondence to be addressed to:

Fengguo Xu, Tel.: +86 25-83271021, Email: fengguoxu@cpu.edu.cn

Pei Zhang, Tel.: +86 25-83271021, Email: peizhang@cpu.edu.cn

## Extended methods

### Sample Preparation

Metabolites in kidney tissue were extracted using a precooled solvent mixture of acetonitrile (ACN, Merck, Darmstadt, Germany), methanol (MeOH, Merck, Darmstadt, Germany), and ultra-pure water (Millipore, Watford, UK) in a 2:2:1 (v/v/v) ratio. A tissue-to-solvent ratio of 1:30 (w/v, mg/ $\mu$ L) was used for extraction. Samples were centrifuged at 14,000 rpm at 4 °C for 10 min. A 100  $\mu$ L aliquot of the supernatant from each sample was transferred to a new tube and completely dried under a stream of nitrogen at 37 °C using an MD200-1 Sample Concentration system (Allsheng, Hangzhou, China). All dried samples were stored at -80 °C until chemical derivatization and analysis.

### Chemical derivatization

Two distinct derivatization procedures were employed to cover a broader range of metabolites.

*Amino and phenol submetabolome.* For each dried sample, 20  $\mu$ L of ACN-H<sub>2</sub>O (1:1, v/v), 100  $\mu$ L of carbonate buffer (composed of NaHCO<sub>3</sub> and Na<sub>2</sub>CO<sub>3</sub> (Nanjing Chemical Reagent, Jiangsu, China); pH 10), and 100  $\mu$ L of 20 mM dansyl chloride (Dns-Cl, J&K Chemical Ltd, China) solution were added. The mixture was incubated at 35 °C for 15 min. To quench the reaction, 40  $\mu$ L of 100 mM NaOH solution (Nanjing Chemical Reagent, Jiangsu, China) was added and incubated at 35 °C for 10 min. Excess alkaline was then neutralized by adding 40  $\mu$ L of 425 mM formic acid (Merck, Darmstadt, Germany).

*Carboxyl submetabolome.* Dried samples were reconstituted with 20  $\mu$ L of ACN-MeOH-H<sub>2</sub>O (2:2:1, v/v/v), 40  $\mu$ L of MeOH (Merck, Darmstadt, Germany), 20  $\mu$ L of 6 mM HATU (J&K Chemical Ltd, China) solution, and 20  $\mu$ L of 12 mM dansyl piperazine (Dns-PP) solution. After thorough mixing, the derivatization reaction was incubated at 55 °C for 60 min.

### Instrumental analysis

Metabolite quantification was performed using a Shimadzu Nexera UPLC system interfaced with an 8060 triple quadrupole mass spectrometer (Shimadzu, Kyoto, Japan) equipped with an electrospray ionization (ESI) source. The autosampler was maintained at

4 °C. Chromatographic separation was achieved on an Agilent Zorbax Eclipse XDB-C18 column (2.1 × 100 mm, 1.8 µm, Agilent Technologies, Santa Clara, CA) maintained at 50 °C. The mobile phase consisted of 0.1% formic acid in H<sub>2</sub>O (v/v) (Mobile Phase A) and methanol (Mobile Phase B). The flow rate was set at 0.4 mL/min, and the injection volume was 5 µL.

Specific gradient programs were used for the two derivatization methods. Dns-Cl labelled metabolites: The gradient was as follows: 0-2 min, 30% B; 2-5 min, 30-52% B; 5-15 min, 52-65% B; 15-20 min, 65-78% B; 20-23 min, 78% B; 23-27 min, 100% B; and 27-29 min, 30% B. Dns-PP labelled metabolites: The gradient was as follows: 0-2 min, 30% B; 2-5 min, 30-52% B; 5-15 min, 52-65% B; 15-20 min, 65-78% B; 20-22.5 min, 78% B; 22.5-29 min, 90% B; 29-38 min, 100% B; and 38-40 min, 30% B.

The mass spectrometer was operated in scheduled multiple reaction monitoring (MRM) mode with positive ion detection. Optimal parameters were: spray voltage, 4.5 kV; nebulizing gas, 3 L/min; drying gas, 15 L/min; heat block temperature, 400 °C; and desorption line temperature, 250 °C.

**Table S1.** Primer sequences

| Species | Gene name          | Sequence                                                                |
|---------|--------------------|-------------------------------------------------------------------------|
| Mus     | <i>GAPDH</i>       | F:5'-AGGTCGGTGTGAACGGATTTG-3'<br>R:5'-TGTAGACCATGTAGTTGAGGTCA-3'        |
| Mus     | <i>Acta2</i>       | F:5'-GTCCCAGACATCAGGGAGTAA-3'<br>R:5'-TCGGATACTTCAGCGTCAGGA-3'          |
| Mus     | <i>Col1A1</i>      | F:5'-GATGACGTGCAATGCAATGAA-3'<br>R:5'-CCCTCGACTCCTACATCTTCTGA-3'        |
| Mus     | <i>Col3A1</i>      | F:5'-CTGTAACATGGAAACTGGGGAAA-3'<br>R:5'-CCATAGCTGAACTGAAAACCACC-3'      |
| Mus     | <i>Vimentin</i>    | F:5'-CGGCTGCGAGAGAAATTGC-3'<br>R:5'-CCACTTTCGGTTCAAGGTCAAG-3'           |
| Mus     | <i>Fibronectin</i> | F:5'-ATGTGGACCCCTCCTGATAGT-3'<br>R:5'-GCCCAGTGATTTCAGCAAAGG-3'          |
| Mus     | <i>TGF-β1</i>      | F:5'-ACTGGAGTTGTACGGCAGTG-3'<br>R:5'-GGGGCTGATCCCGTTGATT-3'             |
| Mus     | <i>IDO1</i>        | F:5'-TCCGGTCACGAATGTGGAAC-3'<br>R:5'-AAGCTGCCCGTTCTCAATCA-3'            |
| Mus     | <i>IDO2</i>        | F:5'-CCTGGATGGAAATTGCCCTCAG-3'<br>R:5'-CGCTGCTCACGGTAACTCTTTAG-3'       |
| Mus     | <i>KMO</i>         | F:5'-ATACCATGGTCGCCTTCACC-3'<br>R:5'-TGCACAAGTAGGTAGGTGCC-3'            |
| Mus     | <i>KYNU</i>        | F:5'-CTCATACTGTCAAGCCTGCGTTAG-3'<br>R:5'-GAGGGTTTGAAATTCGGAATCCATTG-3'  |
| Mus     | <i>KYAT1</i>       | F:5'-CCAGTCTTTAAAGGGCACACAG-3'<br>R:5'-CCTGAGTCCCACACACAGTTCT-3'        |
| Mus     | <i>KYAT3</i>       | F:5'-CGATGAGGTTTATGAATGGCTTGTC-3'<br>R:5'-CCAGCACTTCTATTGTTATTGTTCTC-3' |
| Mus     | <i>TPH1</i>        | F:5'-GCCAAGGAAGACGTTATGGA-3'<br>R:5'-GTCTTTGAAGCCAGGGTGGT-3'            |
| Homo    | <i>GAPDH</i>       | F:5'-GGAGCGAGATCCCTCCAAAAT-3'<br>R:5'-GGCTGTTGTCATACTTCTCATGG-3'        |
| Homo    | <i>Col1A1</i>      | F:5'-GCTCGTGGAAATGATGGTGC-3'<br>R:5'-ACCCTGGGGACCTTCAGAG-3'             |
| Homo    | <i>Fibronectin</i> | F:5'-CGGTGGCTGTCAGTCAAAG-3'<br>R:5'-AAACCTCGGCTTCTCCATAA-3'             |
| Homo    | <i>TGF-β1</i>      | F:5'-GGCCAGATCCTGTCCAAGC-3'<br>R:5'-GTGGGTTTCCACCATTAGCAC-3'            |
| Homo    | <i>Vimentin</i>    | F:5'-GAGGAAGCCGAAAACACCCT-3'<br>R:5'-ACGCATTGTCAACATCCTGTC-3'           |

**Table S2.** Metabolite retention time and MRM parameters

| No. | Metabolite                                                   | Abbreviation | MW     | RT (min) | Parent ion (m/z) | Fragment (m/z) | IS RT (min) | IS Parent ion (m/z) | IS Fragment (m/z) |
|-----|--------------------------------------------------------------|--------------|--------|----------|------------------|----------------|-------------|---------------------|-------------------|
| 1   | Ethanolamine                                                 | EA           | 61.08  | 5.75     | 295.00           | 156.60         | 5.40        | 301.00              | 160.10            |
| 2   | Putrescine                                                   | Put          | 88.15  | 17.40    | 555.20           | 170.10         | 16.75       | 567.20              | 176.10            |
| 3   | L-Histidine                                                  | His          | 155.15 | 18.45    | 622.70           | 169.70         | 17.91       | 634.70              | 176.00            |
| 4   | L-Arginine                                                   | Arg          | 174.20 | 3.75     | 408.10           | 170.20         | 3.33        | 414.10              | 176.20            |
| 5   | L-Asparagine                                                 | Asn          | 132.12 | 3.95     | 366.10           | 170.10         | 3.72        | 372.10              | 176.10            |
| 6   | L-Glutamine                                                  | Gln          | 146.14 | 4.52     | 380.20           | 169.50         | 4.07        | 386.20              | 176.00            |
| 7   | L-Serine                                                     | Ser          | 105.09 | 5.09     | 338.70           | 169.50         | 4.66        | 344.70              | 176.00            |
| 8   | L-Glycine                                                    | Gly          | 75.07  | 5.71     | 309.00           | 156.50         | 5.33        | 315.00              | 160.10            |
| 9   | L-Threonine                                                  | Thr          | 119.12 | 6.08     | 353.20           | 157.20         | 5.76        | 359.20              | 160.10            |
| 10  | L-Alanine                                                    | Ala          | 89.09  | 6.53     | 323.20           | 156.50         | 6.22        | 329.20              | 160.10            |
| 11  | L-Proline                                                    | Pro          | 115.13 | 8.09     | 349.00           | 169.50         | 7.73        | 355.00              | 176.25            |
| 12  | L-Methionine                                                 | Met          | 149.21 | 8.75     | 383.00           | 169.50         | 8.35        | 389.00              | 176.00            |
| 13  | L-Valine                                                     | Val          | 117.15 | 9.04     | 351.10           | 156.70         | 8.62        | 357.10              | 160.10            |
| 14  | L-Tryptophan                                                 | Trp          | 204.23 | 9.61     | 438.20           | 170.10         | 9.09        | 444.20              | 176.10            |
| 15  | L-Isoleucine                                                 | Ile          | 131.17 | 11.18    | 365.00           | 156.50         | 10.71       | 371.00              | 160.10            |
| 16  | L-Leucine                                                    | Leu          | 131.17 | 11.42    | 365.00           | 156.50         | 10.97       | 371.00              | 160.10            |
| 17  | L-Phenylalanine                                              | Phe          | 165.19 | 11.50    | 399.10           | 169.50         | 10.92       | 405.10              | 176.00            |
| 18  | L-Ornithine                                                  | Orn          | 132.16 | 14.99    | 599.20           | 170.00         | 14.18       | 611.20              | 176.00            |
| 19  | L-Lysine                                                     | Lys          | 146.19 | 15.91    | 613.20           | 170.10         | 15.17       | 625.20              | 176.10            |
| 20  | L-Tyrosine                                                   | Tyr          | 181.19 | 20.11    | 648.20           | 170.10         | 19.79       | 660.20              | 176.10            |
| 21  | L-Aspartic acid                                              | Asp          | 133.10 | 3.95     | 367.37           | 170.10         | 3.42        | 373.37              | 176.10            |
| 22  | L-Glutamic acid                                              | Glu          | 147.13 | 5.30     | 381.40           | 169.50         | 4.93        | 387.40              | 176.00            |
| 23  | L-Citrulline                                                 | Cit          | 175.19 | 4.91     | 409.45           | 170.10         | 4.52        | 415.45              | 176.10            |
| 24  | N $\epsilon$ -Methyl-L-lysine                                | MeLys        | 160.21 | 18.41    | 626.85           | 170.15         | 17.93       | 638.85              | 176.15            |
| 25  | N $\epsilon$ -N $\epsilon$ -N $\epsilon$ -Trimethyl-L-lysine | TMeLys       | 188.27 | 3.46     | 422.05           | 170.15         | 3.06        | 428.05              | 176.15            |

| No. | Metabolite                 | Abbreviation | MW     | RT (min) | Parent ion (m/z) | Fragment (m/z) | IS RT (min) | IS Parent ion (m/z) | IS Fragment (m/z) |
|-----|----------------------------|--------------|--------|----------|------------------|----------------|-------------|---------------------|-------------------|
| 26  | Nε-Acetyl-L-lysine         | AceLys       | 188.22 | 6.16     | 421.75           | 170.15         | 5.92        | 427.75              | 176.15            |
| 27  | NG-NG'-Dimethyl-L-arginine | SDMA         | 202.25 | 4.49     | 435.80           | 170.15         | 4.19        | 441.80              | 176.15            |
| 28  | NG, NG-Dimethyl-L-arginine | ADMA         | 202.25 | 4.33     | 435.80           | 170.15         | 4.01        | 441.80              | 176.15            |
| 29  | NG-Methyl-L-arginine       | MeArg        | 188.23 | 4.12     | 422.00           | 170.15         | 3.77        | 428.00              | 176.15            |
| 30  | Kynurenine                 | KYN          | 208.21 | 8.89     | 442.20           | 170.15         | 8.48        | 448.20              | 176.15            |
| 31  | Xanthurenic acid           | XA           | 205.17 | 9.51     | 439.10           | 170.10         | 9.21        | 445.10              | 176.10            |
| 32  | 6-Hydroxymelatonin         | HMT          | 248.28 | 11.74    | 482.20           | 170.05         | 11.41       | 488.20              | 176.05            |
| 33  | 5-Hydroxyindoleacetate     | HIAA         | 191.18 | 11.92    | 425.10           | 170.10         | 11.62       | 431.10              | 176.10            |
| 34  | N-Acetyl-serotonin         | NAS          | 218.25 | 12.02    | 452.15           | 170.05         | 11.74       | 458.15              | 176.05            |
| 35  | Tryptamine                 | Trpm         | 160.22 | 13.25    | 394.20           | 170.05         | 12.71       | 400.20              | 176.05            |
| 36  | 3-Hydroxyanthranilic acid  | HAA          | 153.14 | 15.54    | 387.20           | 170.10         | 15.23       | 393.20              | 176.10            |
| 37  | Kynurenic acid             | KA           | 189.17 | 17.14    | 423.15           | 170.15         | 16.89       | 429.15              | 176.15            |
| 38  | 3-Hydroxy-DL-kynurenine    | HK           | 224.21 | 20.62    | 691.20           | 170.05         | 20.34       | 703.20              | 176.05            |
| 39  | Serotonin                  | 5-HT         | 176.22 | 20.79    | 643.20           | 170.05         | 20.50       | 655.20              | 176.05            |
| 40  | Indole-3-carboxaldehyde    | IAld         | 145.16 | 18.68    | 379.15           | 169.50         | 18.46       | 385.15              | 176.10            |
| 41  | 5-Hydroxy-L-tryptophan     | HTP          | 220.23 | 18.48    | 687.30           | 170.20         | 18.01       | 699.30              | 176.20            |
| 42  | Xanthine                   | Xan          | 152.11 | 7.26     | 386.30           | 170.00         | 7.10        | 392.30              | 176.00            |
| 43  | Hypoxanthine               | Hyp          | 136.11 | 8.45     | 369.90           | 169.70         | 8.25        | 375.90              | 176.00            |
| 44  | Cytosine                   | Cyt          | 111.10 | 6.87     | 345.00           | 170.15         | 6.67        | 351.00              | 176.15            |
| 45  | 5-Methylcytosine           | MeCyt        | 125.13 | 7.73     | 358.95           | 170.20         | 7.50        | 364.95              | 176.20            |
| 46  | 2'-Deoxycytidine           | dC           | 227.22 | 6.46     | 461.00           | 112.15         | 6.32        | 467.00              | 112.15            |
| 47  | 5-Methyl-2'-deoxycytidine  | MedC         | 241.24 | 6.65     | 475.00           | 126.20         | 6.52        | 481.00              | 126.20            |
| 48  | Cytidine                   | Cyd          | 243.22 | 5.75     | 477.10           | 112.10         | 5.59        | 483.10              | 112.10            |
| 49  | 5-Methylcytidine           | MeCyd        | 257.24 | 5.92     | 491.00           | 126.20         | 5.77        | 497.00              | 126.20            |
| 50  | Adenine                    | Ade          | 135.13 | 9.33     | 369.00           | 170.20         | 9.08        | 375.00              | 176.20            |
| 51  | 1-Methyladenine            | MeAde        | 149.15 | 5.91     | 382.70           | 170.10         | 5.84        | 388.70              | 176.10            |
| 52  | Adenosine                  | Ado          | 267.24 | 5.33     | 500.95           | 136.20         | 5.21        | 506.95              | 136.20            |

| No. | Metabolite                 | Abbreviation | MW     | RT (min) | Parent ion (m/z) | Fragment (m/z) | IS RT (min) | IS Parent ion (m/z) | IS Fragment (m/z) |
|-----|----------------------------|--------------|--------|----------|------------------|----------------|-------------|---------------------|-------------------|
| 53  | 1-Methyladenosine          | MeAdo        | 281.27 | 3.50     | 514.80           | 150.10         | 3.36        | 520.80              | 150.10            |
| 54  | 2'-Deoxyadenosine          | dA           | 251.24 | 8.89     | 485.00           | 119.20         | 8.65        | 491.00              | 119.20            |
| 55  | Guanine                    | Gua          | 151.13 | 7.81     | 384.90           | 170.10         | 7.59        | 390.90              | 176.10            |
| 56  | Guanosine                  | Guo          | 283.24 | 4.33     | 517.00           | 135.10         | 4.02        | 523.00              | 135.10            |
| 57  | 2'-Deoxyguanosine          | dG           | 267.24 | 8.10     | 501.00           | 152.10         | 7.88        | 507.00              | 152.10            |
| 58  | Uracil                     | Ura          | 112.09 | 8.43     | 345.95           | 169.70         | 8.21        | 351.95              | 176.00            |
| 59  | Uridine                    | Urd          | 244.20 | 6.88     | 477.95           | 113.20         | 6.68        | 483.95              | 113.20            |
| 60  | 2'-Deoxyuridine            | dU           | 228.20 | 8.25     | 461.95           | 113.20         | 8.01        | 467.95              | 113.20            |
| 61  | Thymine                    | Thy          | 126.12 | 10.40    | 359.90           | 169.50         | 10.13       | 365.90              | 176.20            |
| 62  | Thymidine                  | Thd          | 242.23 | 9.20     | 476.00           | 127.10         | 8.94        | 482.00              | 127.10            |
| 63  | 4-Aminobutyric acid        | GABA         | 103.12 | 6.52     | 337.00           | 169.50         | 6.23        | 343.00              | 176.00            |
| 64  | Cholic acid                | CA           | 408.58 | 23.59    | 710.00           | 320.10         | 23.47       | 716.00              | 326.10            |
| 65  | Chenodeoxycholic acid      | CDCA         | 392.57 | 24.17    | 693.80           | 320.20         | 24.13       | 699.80              | 326.20            |
| 66  | Deoxycholic acid           | DCA          | 392.57 | 24.38    | 694.20           | 320.20         | 24.34       | 700.20              | 326.20            |
| 67  | Lithocholic acid           | LCA          | 376.57 | 25.26    | 678.05           | 320.15         | 25.21       | 684.05              | 326.15            |
| 68  | Glycocholic acid           | GCA          | 465.62 | 21.97    | 767.55           | 320.20         | 21.83       | 773.55              | 326.20            |
| 69  | Ursodeoxycholic acid       | UDCA         | 392.57 | 21.89    | 694.60           | 320.20         | 21.77       | 700.60              | 326.20            |
| 70  | Glycodeoxycholic acid      | GDCA         | 449.62 | 23.89    | 751.25           | 320.20         | 23.86       | 757.25              | 326.20            |
| 71  | Glycochenodeoxycholic acid | GCDCA        | 449.62 | 23.72    | 751.05           | 320.10         | 23.68       | 757.05              | 326.10            |
| 72  | Glycoursodeoxycholic acid  | GUDCA        | 449.62 | 20.48    | 751.55           | 320.20         | 20.36       | 757.55              | 326.20            |
| 73  | L-Carnitine                | Car          | 161.20 | 4.99     | 463.10           | 386.15         | 4.68        | 469.10              | 392.15            |
| 74  | L-Acetylcarnitine          | Car2         | 203.24 | 5.43     | 505.25           | 386.15         | 5.27        | 511.25              | 392.15            |
| 75  | Propionylcarnitine         | Car3         | 217.26 | 6.03     | 519.30           | 386.15         | 5.91        | 525.30              | 392.15            |
| 76  | 3-Hydroxybutyryl-carnitine | Car4-OH      | 247.29 | 5.72     | 549.30           | 386.05         | 5.58        | 555.30              | 392.05            |
| 77  | Butyrylcarnitine           | Car4         | 231.29 | 6.60     | 533.30           | 386.15         | 6.59        | 539.30              | 392.15            |
| 78  | Tiglylcarnitine            | Car5:1       | 243.30 | 6.96     | 545.10           | 386.15         | 6.83        | 551.10              | 392.15            |
| 79  | Isovaleryl-L-carnitine     | isoCar5      | 245.32 | 7.49     | 547.35           | 386.15         | 7.32        | 553.35              | 392.15            |

| No. | Metabolite                                | Abbreviation | MW     | RT (min) | Parent ion (m/z) | Fragment (m/z) | IS RT (min) | IS Parent ion (m/z) | IS Fragment (m/z) |
|-----|-------------------------------------------|--------------|--------|----------|------------------|----------------|-------------|---------------------|-------------------|
| 80  | Valerylcarnitine                          | Car5         | 245.32 | 7.78     | 547.15           | 386.15         | 7.61        | 553.15              | 392.15            |
| 81  | 3-Hydroxyhexanoyl carnitine               | Car6-OH      | 275.34 | 7.25     | 577.15           | 386.15         | 7.11        | 583.15              | 392.15            |
| 82  | Hexanoylcarnitine                         | Car6         | 259.34 | 9.33     | 561.15           | 386.15         | 9.14        | 567.15              | 392.15            |
| 83  | L-Octanoylcarnitine                       | Car8         | 287.40 | 13.45    | 588.90           | 386.15         | 13.23       | 594.90              | 392.15            |
| 84  | 3-Hydroxydodecanoyl-L-carnitine           | Car12-OH     | 359.50 | 18.27    | 661.40           | 386.15         | 18.16       | 667.40              | 392.15            |
| 85  | Decanoyl-L-carnitine                      | Car10        | 315.45 | 17.51    | 617.35           | 386.15         | 17.36       | 623.35              | 392.15            |
| 86  | trans-2-Dodecenoyl-L-carnitine            | Car12:1      | 341.49 | 19.31    | 643.40           | 386.05         | 19.21       | 649.40              | 392.05            |
| 87  | Lauroyl-L-carnitine                       | Car12        | 343.50 | 19.84    | 645.40           | 386.15         | 19.75       | 651.40              | 392.15            |
| 88  | cis, cis-5,8-Tetradecadienoyl-L-carnitine | Car14:2      | 367.52 | 19.73    | 669.55           | 386.15         | 19.65       | 675.55              | 392.15            |
| 89  | trans-2-Tetradecenoyl-L-carnitine         | Car14:1      | 369.54 | 21.05    | 671.55           | 386.15         | 20.99       | 677.55              | 392.15            |
| 90  | Myristoyl-L-carnitine                     | Car14        | 371.55 | 21.50    | 673.45           | 386.05         | 21.44       | 679.45              | 392.05            |
| 91  | cis, cis-9,12-Octadecadienoyl-L-carnitine | Car18:2      | 423.63 | 23.03    | 725.55           | 386.15         | 22.91       | 731.55              | 392.15            |
| 92  | trans-2-Hexadecenoyl-L-carnitine          | Car16:1      | 397.59 | 23.09    | 699.60           | 386.15         | 22.97       | 705.60              | 392.15            |
| 93  | 3-Hydroxyoctadecanoyl-L-carnitine         | Car18-OH     | 443.66 | 23.76    | 745.60           | 386.15         | 23.75       | 751.60              | 392.15            |
| 94  | Palmitoyl-L-carnitine                     | Car16        | 399.61 | 23.70    | 702.25           | 386.15         | 23.68       | 708.25              | 392.15            |
| 95  | Oleoyl-L-carnitine                        | Car18:1      | 425.64 | 23.77    | 727.65           | 386.15         | 23.76       | 733.65              | 392.15            |
| 96  | Stearoyl-L-carnitine                      | Car18        | 427.66 | 23.87    | 729.10           | 386.05         | 23.87       | 735.10              | 392.05            |
| 97  | Acetic acid                               | C2           | 60.05  | 7.47     | 362.20           | 320.00         | 7.20        | 368.20              | 326.00            |
| 98  | Propionic acid                            | C3           | 74.08  | 8.91     | 376.20           | 320.10         | 8.58        | 382.20              | 326.00            |
| 99  | Isobutyric acid                           | C4-2         | 88.11  | 10.53    | 390.30           | 320.10         | 10.17       | 396.30              | 326.00            |
| 100 | Butyric acid                              | C4-1         | 88.11  | 10.89    | 390.30           | 320.10         | 10.52       | 396.30              | 326.00            |
| 101 | 2-Methylbutyric acid                      | C5-1         | 102.13 | 12.67    | 403.80           | 320.10         | 12.29       | 409.80              | 326.10            |
| 102 | Isovaleric acid                           | C5-2         | 102.13 | 13.03    | 404.10           | 320.20         | 12.65       | 410.10              | 326.00            |
| 103 | Valeric acid                              | C5-3         | 102.13 | 13.54    | 404.10           | 320.10         | 13.17       | 410.10              | 326.00            |

| No. | Metabolite                               | Abbreviation | MW     | RT (min) | Parent ion (m/z) | Fragment (m/z) | IS RT (min) | IS Parent ion (m/z) | IS Fragment (m/z) |
|-----|------------------------------------------|--------------|--------|----------|------------------|----------------|-------------|---------------------|-------------------|
| 104 | 3-Methylvaleric acid                     | C6-2         | 116.16 | 15.66    | 418.10           | 320.10         | 15.29       | 424.10              | 326.10            |
| 105 | Isocaproic acid                          | C6-3         | 116.16 | 16.08    | 418.10           | 320.20         | 15.72       | 424.10              | 326.20            |
| 106 | Hexanoic acid                            | C6-1         | 116.16 | 16.45    | 418.10           | 320.00         | 16.10       | 424.10              | 326.00            |
| 107 | 2-Methylhexanoic acid                    | C7-2         | 130.18 | 17.93    | 432.10           | 320.20         | 17.68       | 438.10              | 326.20            |
| 108 | Heptanoic acid                           | C7-1         | 130.18 | 18.78    | 432.10           | 320.20         | 18.56       | 438.10              | 326.20            |
| 109 | 2-Ethylhexanoic acid                     | C8-3         | 144.21 | 19.29    | 446.10           | 320.20         | 19.09       | 452.10              | 326.20            |
| 110 | 2-Methylheptanoic acid                   | C8-2         | 144.21 | 19.79    | 446.10           | 320.10         | 19.61       | 452.10              | 326.10            |
| 111 | Octanoic acid                            | C8-1         | 144.21 | 20.52    | 446.10           | 320.20         | 20.35       | 452.10              | 326.20            |
| 112 | 4-Methyloctanoic acid                    | C9-2         | 158.24 | 21.60    | 460.10           | 320.10         | 21.45       | 466.10              | 326.10            |
| 113 | Nonanoic acid                            | C9-1         | 158.24 | 22.03    | 460.10           | 170.00         | 21.87       | 466.10              | 326.20            |
| 114 | Decanoic acid                            | C10          | 172.26 | 23.70    | 473.60           | 170.00         | 23.63       | 479.60              | 176.00            |
| 115 | Dodecanoic acid                          | C12          | 200.32 | 24.79    | 501.70           | 320.30         | 24.74       | 507.70              | 176.00            |
| 116 | Tridecanoic acid                         | C13          | 214.34 | 25.43    | 515.90           | 320.10         | 25.21       | 521.90              | 326.00            |
| 117 | Myristic acid                            | C14          | 228.37 | 26.21    | 530.40           | 320.00         | 26.13       | 536.40              | 326.00            |
| 118 | cis-5,8,11,14,17-Eicosapentaenoic acid   | C20:5        | 302.45 | 26.34    | 604.20           | 320.00         | 26.27       | 610.20              | 326.00            |
| 119 | $\gamma$ -Linolenic acid                 | C18:3        | 278.43 | 26.41    | 580.00           | 320.10         | 26.34       | 586.00              | 326.00            |
| 120 | Palmitoleic acid                         | C16:1        | 254.41 | 26.71    | 556.50           | 320.10         | 26.62       | 562.00              | 326.00            |
| 121 | Pentadecanoic acid                       | C15          | 242.40 | 27.17    | 544.20           | 320.00         | 27.08       | 550.20              | 326.00            |
| 122 | cis-4,7,10,13,16,19-Docosahexaenoic acid | C22:6        | 328.49 | 27.19    | 630.30           | 157.00         | 27.09       | 636.00              | 326.00            |
| 123 | Arachidonic acid                         | C20:4        | 304.47 | 27.39    | 606.20           | 157.00         | 27.29       | 612.20              | 326.10            |
| 124 | Linoleic acid                            | C18:2        | 280.45 | 27.45    | 582.30           | 263.45         | 27.36       | 588.00              | 326.10            |
| 125 | Palmitic acid                            | C16          | 256.42 | 28.40    | 558.20           | 320.00         | 28.28       | 564.00              | 326.10            |
| 126 | Oleic acid                               | C18:1        | 282.46 | 29.13    | 584.30           | 319.50         | 28.99       | 590.30              | 326.20            |
| 127 | Stearic acid                             | C18          | 284.48 | 30.65    | 586.30           | 320.10         | 30.59       | 592.00              | 326.20            |
| 128 | cis-11-Eicosenoic acid                   | C20:1        | 310.51 | 30.84    | 612.30           | 320.00         | 30.79       | 618.30              | 326.00            |

| No. | Metabolite                  | Abbreviation | MW     | RT (min) | Parent ion (m/z) | Fragment (m/z) | IS RT (min) | IS Parent ion (m/z) | IS Fragment (m/z) |
|-----|-----------------------------|--------------|--------|----------|------------------|----------------|-------------|---------------------|-------------------|
| 129 | Nonadecanoic acid           | C19          | 298.50 | 31.12    | 600.50           | 320.10         | 31.08       | 606.50              | 326.00            |
| 130 | Erucic acid                 | C22:1        | 338.57 | 31.74    | 640.50           | 320.10         | 31.69       | 646.50              | 326.20            |
| 131 | Heneicosanoic acid          | C21          | 326.56 | 32.07    | 628.40           | 320.20         | 32.03       | 634.40              | 326.20            |
| 132 | Behenic acid                | C22          | 340.58 | 32.54    | 642.00           | 320.20         | 32.50       | 648.00              | 326.20            |
| 133 | Nervonic acid               | C24:1        | 366.62 | 32.67    | 668.30           | 320.20         | 32.61       | 674.30              | 326.20            |
| 134 | Elaidic acid                | isoC18:1     | 282.46 | 29.48    | 584.88           | 320.10         | 29.34       | 590.50              | 326.20            |
| 135 | 2-Oxoadipic Acid            | OAA          | 160.12 | 19.62    | 763.45           | 170.10         | 19.31       | 775.45              | 176.10            |
| 136 | Indolelactic acid           | ILA          | 205.21 | 11.19    | 507.15           | 170.10         | 10.86       | 513.15              | 176.00            |
| 137 | 5-Methoxyindoleacetic acid  | MIAA         | 205.22 | 11.20    | 507.00           | 320.10         | 10.87       | 513.00              | 326.10            |
| 138 | Indole-3-Acetic acid        | IAA          | 175.18 | 12.43    | 477.20           | 320.20         | 12.09       | 483.20              | 326.20            |
| 139 | 3-Indolepropionic acid      | IPA          | 189.21 | 13.60    | 491.65           | 320.10         | 13.26       | 497.65              | 326.10            |
| 140 | 2-Picolinic acid            | PA           | 123.11 | 8.95     | 425.05           | 170.10         | 8.64        | 431.05              | 176.10            |
| 141 | $\alpha$ -Ketoglutaric acid | KGA          | 146.10 | 19.69    | 748.95           | 320.20         | 19.38       | 760.95              | 326.20            |
| 142 | Succinic acid               | SAD          | 118.09 | 18.52    | 721.45           | 170.20         | 18.11       | 733.45              | 176.00            |
| 143 | Fumaric acid                | FA           | 116.07 | 18.87    | 719.10           | 170.00         | 18.49       | 731.10              | 176.00            |
| 144 | Malic acid                  | MalA         | 134.09 | 17.87    | 737.40           | 170.20         | 17.43       | 749.40              | 176.00            |
| 145 | Pyruvic acid                | PyrA         | 88.06  | 8.71     | 390.00           | 170.20         | 8.39        | 396.00              | 176.00            |
| 146 | Citric acid                 | CitrA        | 192.12 | 23.88    | 1096.90          | 320.20         | 23.80       | 1114.90             | 326.00            |
| 147 | Ketoleucine                 | KICA         | 130.14 | 16.09    | 432.25           | 170.20         | 15.72       | 438.25              | 176.20            |
| 148 | 3-Methyl-2-oxovaleric acid  | KMVA         | 130.14 | 15.65    | 432.25           | 170.00         | 15.28       | 438.25              | 176.00            |
| 149 | alpha-Ketoisovaleric acid   | KIVA         | 116.12 | 12.73    | 418.25           | 170.20         | 12.35       | 424.25              | 176.20            |
| 150 | 3-Hydroxybutyric acid       | BHB          | 104.10 | 7.68     | 406.00           | 320.20         | 7.40        | 412.00              | 176.00            |
| 151 | Isocitric acid              | isoCitrA     | 192.12 | 23.68    | 1096.80          | 170.10         | 23.49       | 1114.80             | 176.00            |

Abbreviations: MW: molecular weight; RT: Retention time; IS: Internal standard.

**Table S3.** Differential metabolites between UUO and Sham group

| No | Metabolite                        | Abb.     | pFDR     | FC (UUO/Control) |
|----|-----------------------------------|----------|----------|------------------|
| 1  | 5-Methylcytidine                  | MeCyd    | 1.12E-03 | 27.11            |
| 2  | 1-Methyladenosine                 | MeAdo    | 2.66E-04 | 19.70            |
| 3  | 5-Methoxyindoleacetic acid        | MIAA     | 9.45E-04 | 16.54            |
| 4  | 2-Oxoadipic acid                  | OAA      | 1.38E-03 | 15.26            |
| 5  | Indolelactic acid                 | ILA      | 8.05E-04 | 9.50             |
| 6  | 3-Hydroxydodecanoyl-L- carnitine  | Car12-OH | 3.51E-04 | 7.41             |
| 7  | 2-Picolinic acid                  | PA       | 2.72E-05 | 7.30             |
| 8  | 5-Hydroxyindoleacetate            | HIAA     | 5.48E-04 | 6.24             |
| 9  | 3-Hydroxyoctadecanoyl-L-carnitine | Car18-OH | 2.14E-04 | 5.81             |
| 10 | Palmitoyl-L-carnitine             | Car16    | 2.51E-04 | 4.99             |
| 11 | Stearoyl-L-carnitine              | Car18    | 1.80E-04 | 4.67             |
| 12 | Cytidine                          | Cyd      | 9.50E-04 | 4.64             |
| 13 | Kynurenine                        | KYN      | 7.53E-05 | 3.75             |
| 14 | Nε-Acetyl-L-lysine                | AceLys   | 2.18E-04 | 3.70             |
| 15 | 3-Indolepropionic acid            | IPA      | 7.97E-03 | 3.58             |
| 16 | trans-2-Hexadecenoyl-L-carnitine  | Car16:1  | 2.19E-04 | 3.26             |
| 17 | Kynurenic acid                    | KA       | 3.25E-04 | 3.07             |
| 18 | Butyrylcarnitine                  | Car4     | 1.29E-05 | 3.02             |
| 19 | Myristoyl-L-carnitine             | Car14    | 5.80E-05 | 3.00             |
| 20 | 3-Hydroxyhexanoyl carnitine       | Car6-OH  | 9.59E-04 | 3.00             |
| 21 | Glycoursodeoxycholic acid         | GUDCA    | 1.88E-03 | 2.87             |
| 22 | 5-Hydroxy-L-tryptophan            | HTP      | 7.12E-04 | 2.86             |
| 23 | Nervonic acid                     | C24:1    | 4.81E-04 | 2.67             |
| 24 | L-Acetylcarnitine                 | Car2     | 7.93E-05 | 2.49             |
| 25 | Oleoyl-L-carnitine                | Car18:1  | 4.50E-04 | 2.39             |
| 26 | Malic acid                        | MalA     | 3.63E-04 | 2.33             |
| 27 | Cytosine                          | Cyt      | 1.11E-02 | 2.31             |
| 28 | NG, NG-Dimethy-L-arginine         | ADMA     | 6.38E-08 | 2.28             |
| 29 | Valerylcarnitine                  | Car5     | 8.12E-05 | 2.21             |
| 30 | Isovaleryl-L-carnitine            | isoCar5  | 1.36E-04 | 2.19             |
| 31 | alpha-Ketoisovaleric acid         | KIVA     | 5.84E-03 | 2.17             |
| 32 | 2'-Deoxyuridine                   | dU       | 2.95E-04 | 2.13             |
| 33 | 3-Methyl-2-oxovaleric acid        | KMVA     | 3.72E-02 | 2.13             |
| 34 | L-Citrulline                      | Cit      | 1.82E-05 | 2.11             |
| 35 | Pentadecanoic acid                | C15      | 3.99E-02 | 1.97             |
| 36 | trans-2-Tetradecenoyl-L-carnitine | Car14:1  | 9.18E-03 | 1.91             |
| 37 | L-Ornithine                       | Orn      | 1.14E-02 | 1.90             |
| 38 | 3-Hydroxybutyryl-carnitine        | Car4-OH  | 1.93E-03 | 1.75             |
| 39 | 6-Hydroxymelatonin                | HMT      | 3.68E-02 | 1.72             |
| 40 | 4-Aminobutyric acid               | GABA     | 7.52E-04 | 1.68             |

| <b>No</b> | <b>Metabolite</b>                         | <b>Abb.</b> | <b>pFDR</b> | <b>FC (UO/Control)</b> |
|-----------|-------------------------------------------|-------------|-------------|------------------------|
| 41        | cis, cis-9,12-Octadecadienoyl-L-carnitine | Car18:2     | 2.30E-03    | 1.64                   |
| 42        | Oleic acid                                | C18:1       | 2.41E-03    | 0.63                   |
| 43        | Uridine                                   | Urd         | 1.94E-03    | 0.53                   |
| 44        | Tiglylcarnitine                           | Car5:1      | 6.13E-03    | 0.52                   |
| 45        | L-Octanoylcarnitine                       | Car8        | 4.68E-03    | 0.48                   |
| 46        | Ethanolamine                              | EA          | 1.41E-05    | 0.47                   |
| 47        | Linoleic acid                             | C18:2       | 3.07E-04    | 0.41                   |
| 48        | Pyruvic acid                              | PyrA        | 4.69E-05    | 0.33                   |
| 49        | Succinic acid                             | SAD         | 1.13E-03    | 0.21                   |
| 50        | Tryptamine                                | Trpm        | 4.75E-05    | 0.16                   |

Abb.: abbreviation; FDR: false discovery rate; FC: fold change.

**Table S4.** LEfSe analysis at the genus level between Sham and UUU

| Group | Biomarker ID             | log10 (abundance) | LDA  |
|-------|--------------------------|-------------------|------|
| UUU   | <i>g_Anaerotruncus</i>   | 2.71              | 2.45 |
| UUU   | <i>g_Helicobacter</i>    | 3.97              | 3.56 |
| UUU   | <i>g_Bacteroides</i>     | 3.87              | 3.33 |
| UUU   | <i>g_Parasutterella</i>  | 3.74              | 3.43 |
| UUU   | <i>g_Parabacteroides</i> | 2.72              | 2.35 |
| Sham  | <i>g_Adlercreutzia</i>   | 2.14              | 2.75 |
| Sham  | <i>g_Allobaculum</i>     | 2.44              | 2.77 |
| Sham  | <i>g_Holdemanina</i>     | 1.90              | 2.95 |
| Sham  | <i>g_Dubosiella</i>      | 4.98              | 4.51 |
| Sham  | <i>g_Bacillus</i>        | 1.20              | 3.48 |

**Table S5.** LEfSe analysis at the genus level between UUO and FPSH

| Group | Biomarker ID                    | log10 (abundance) | LDA  |
|-------|---------------------------------|-------------------|------|
| UUO   | <i>g_Faecalibaculum</i>         | 4.43              | 4.13 |
| UUO   | <i>g_Romboutsia</i>             | 3.40              | 3.03 |
| UUO   | <i>g_Turicibacter</i>           | 4.07              | 3.84 |
| UUO   | <i>g_Enterorhabdus</i>          | 3.40              | 3.04 |
| UUO   | <i>g_Dubosiella</i>             | 4.43              | 4.08 |
| UUO   | <i>g_Parasutterella</i>         | 3.74              | 3.34 |
| UUO   | <i>g_Olsenella</i>              | 1.72              | 3.32 |
| UUO   | <i>g_Bifidobacterium</i>        | 4.09              | 3.82 |
| FPSH  | <i>g_Prevotella</i>             | 4.61              | 4.08 |
| FPSH  | <i>g_Candidatus_Soleaferrea</i> | 1.03              | 3.56 |
| FPSH  | <i>g_Desulfovibrio</i>          | 3.23              | 2.93 |
| FPSH  | <i>g_Erysipelatoclostridium</i> | 3.52              | 3.25 |
| FPSH  | <i>g_Akkermansia</i>            | 5.04              | 4.56 |
| FPSH  | <i>g_UCG</i>                    | 1.77              | 3.12 |
| FPSH  | <i>g_Butyricoccus</i>           | 2.29              | 2.45 |

## Supplementary figures

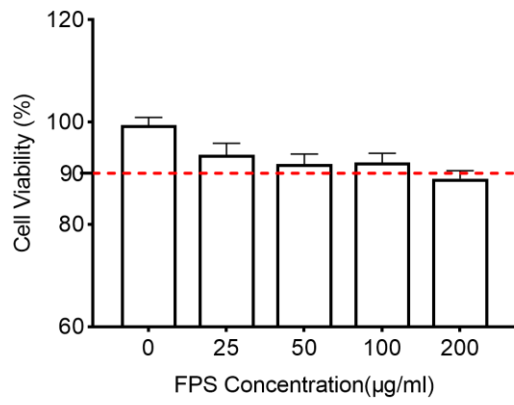

Fig. S1 HK-2 cell viability with FPS treatment.

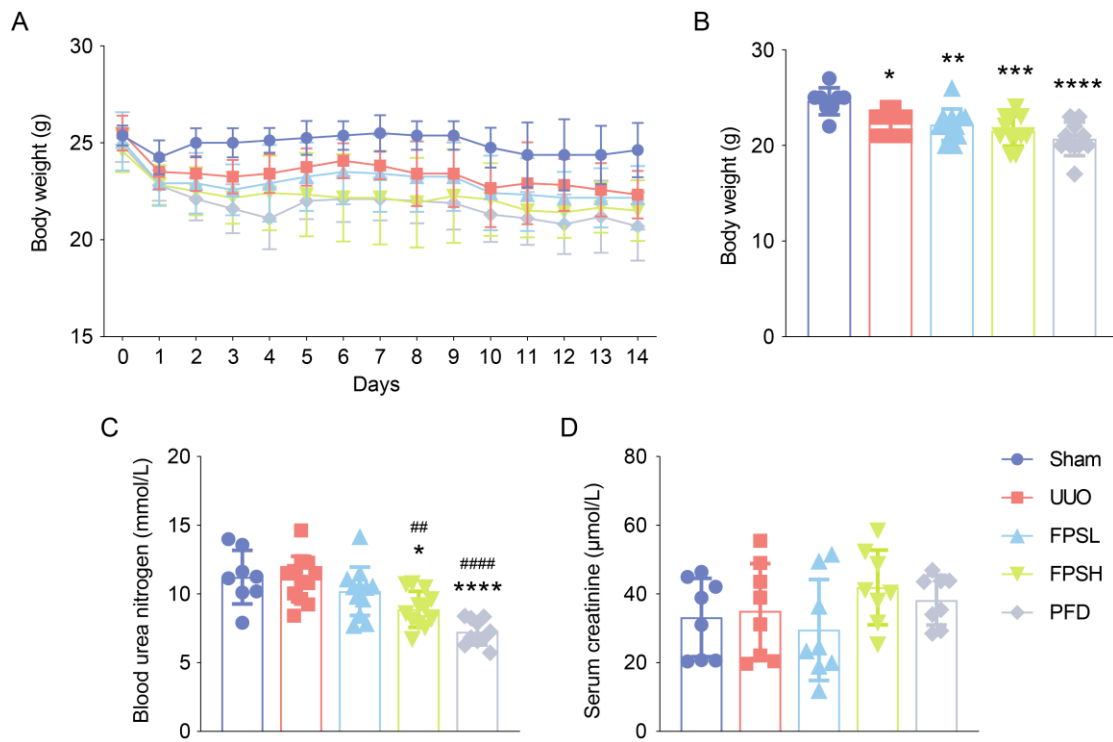

Fig. S2. Body weight and blood biochemical indexes in each group. (A) Daily body weight changes of mice in each group during the experimental period. (B) Comparison of body weight among groups at the end of the experiment. Blood urea nitrogen (C) and serum creatinine (D) levels in each group. Statistical significance is indicated as follows: \*  $p < 0.05$ , \*\*  $p < 0.01$ , \*\*\*  $p < 0.001$ , \*\*\*\*  $p < 0.0001$  versus the Sham group; ##  $p < 0.01$ , ####  $p < 0.0001$  versus the UUO group.

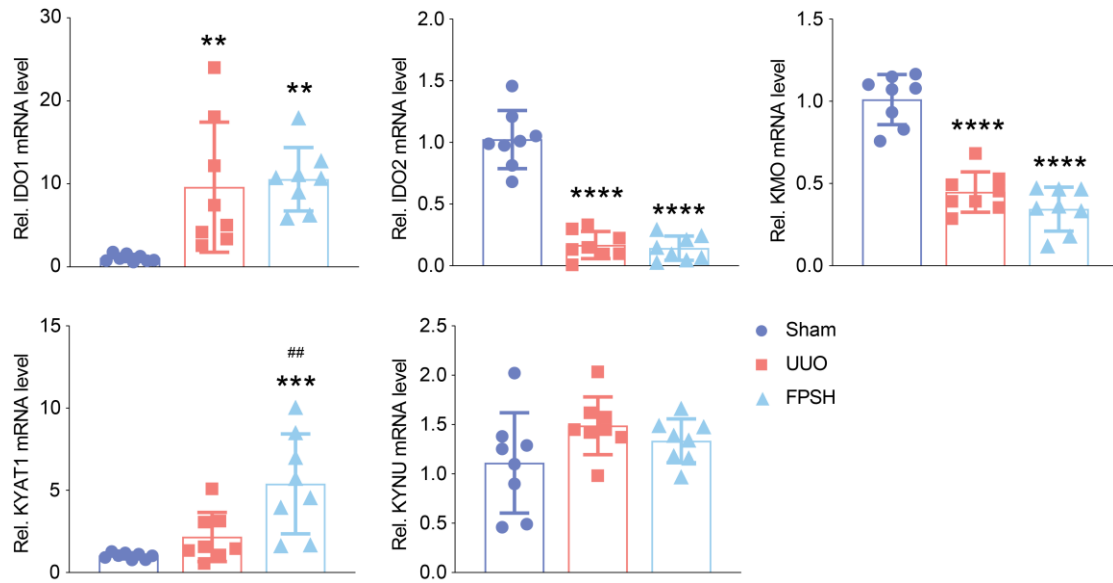

Fig S3. Relative mRNA level of IDO1, IDO2, KMO, KYAT1, and KYNU in kidney. Statistical significance is indicated as follows: \*\*  $p < 0.01$ , \*\*\*  $p < 0.001$ , \*\*\*\*  $p < 0.0001$  versus the Sham group; ##  $p < 0.01$  versus the UUO group.

## Uncropped and unprocessed western blot images

Corresponding to Fig 1. FPS attenuates TGF- $\beta$ 1-induced fibrosis in HK-2 cells. (G)

Relative protein expression of  $\alpha$ -SMA and Vimentin.

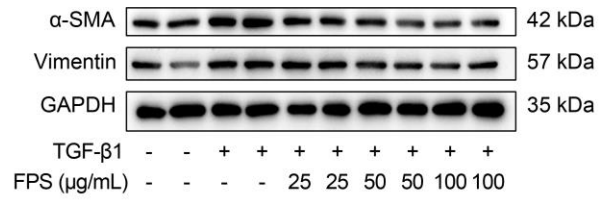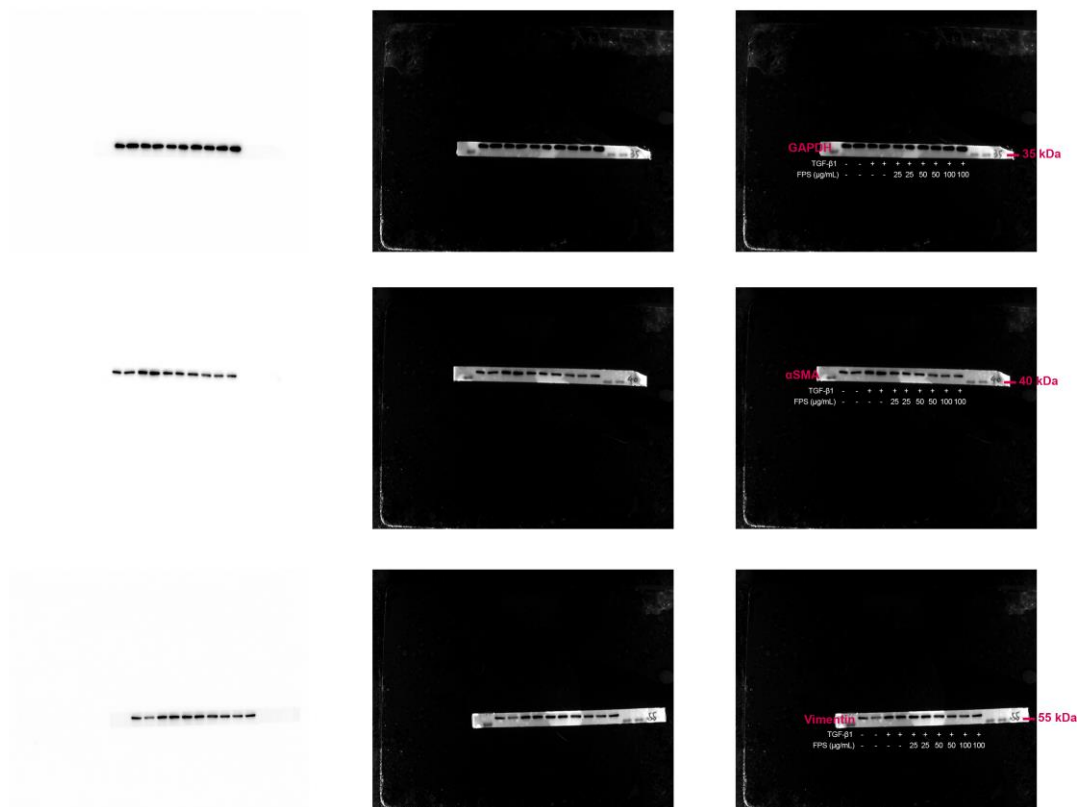

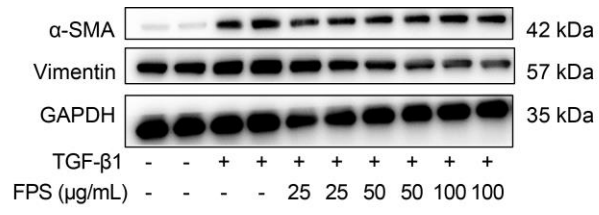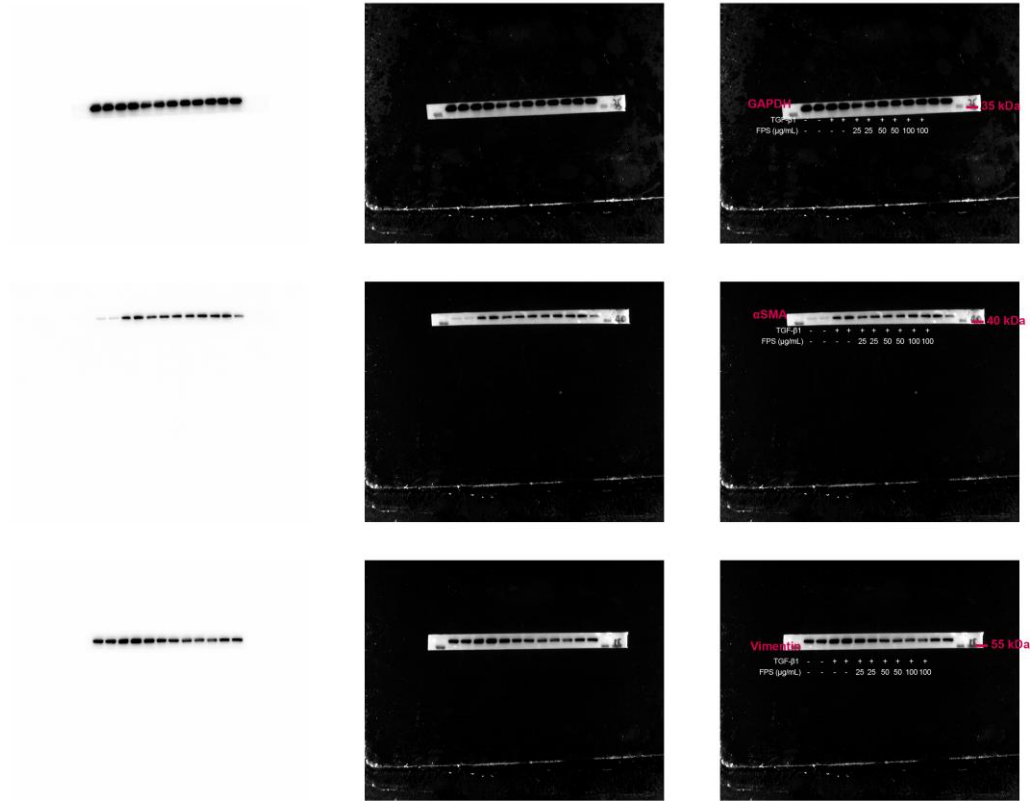

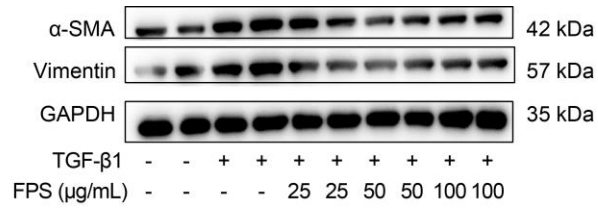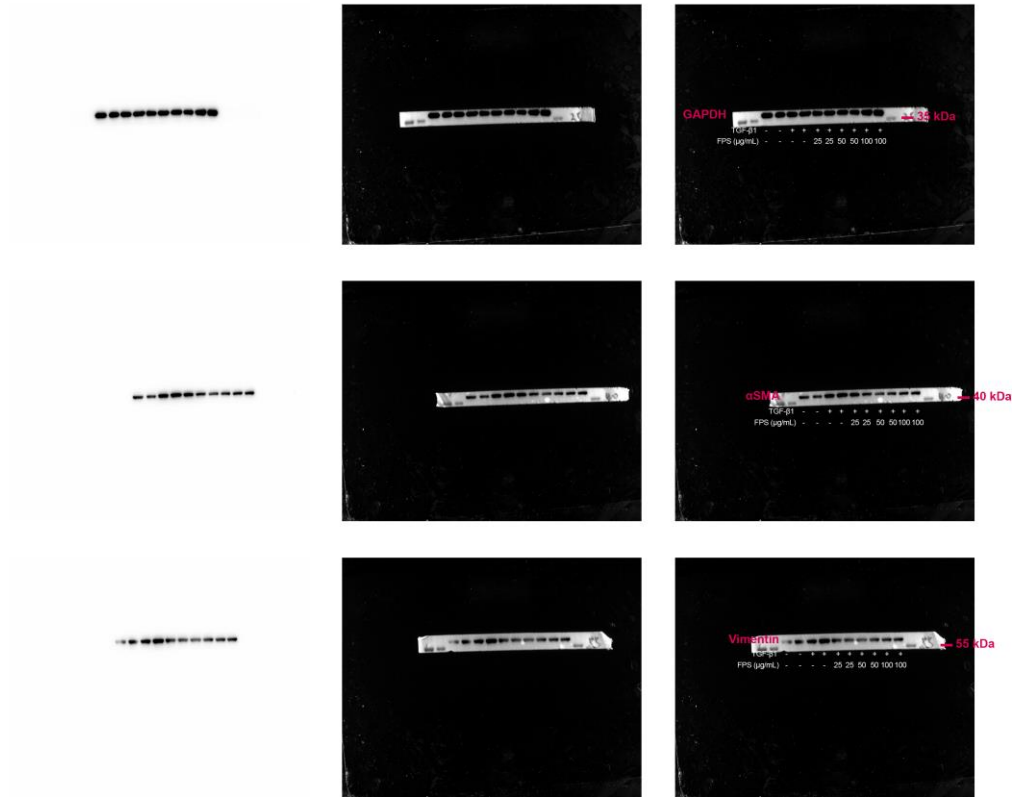

Corresponding to Fig. 2. FPS ameliorates UUO-induced renal fibrosis in mice. (H)  
Relative protein expression of  $\alpha$ -SMA and Vimentin.

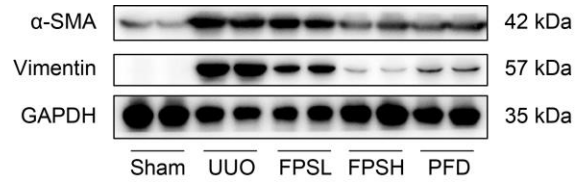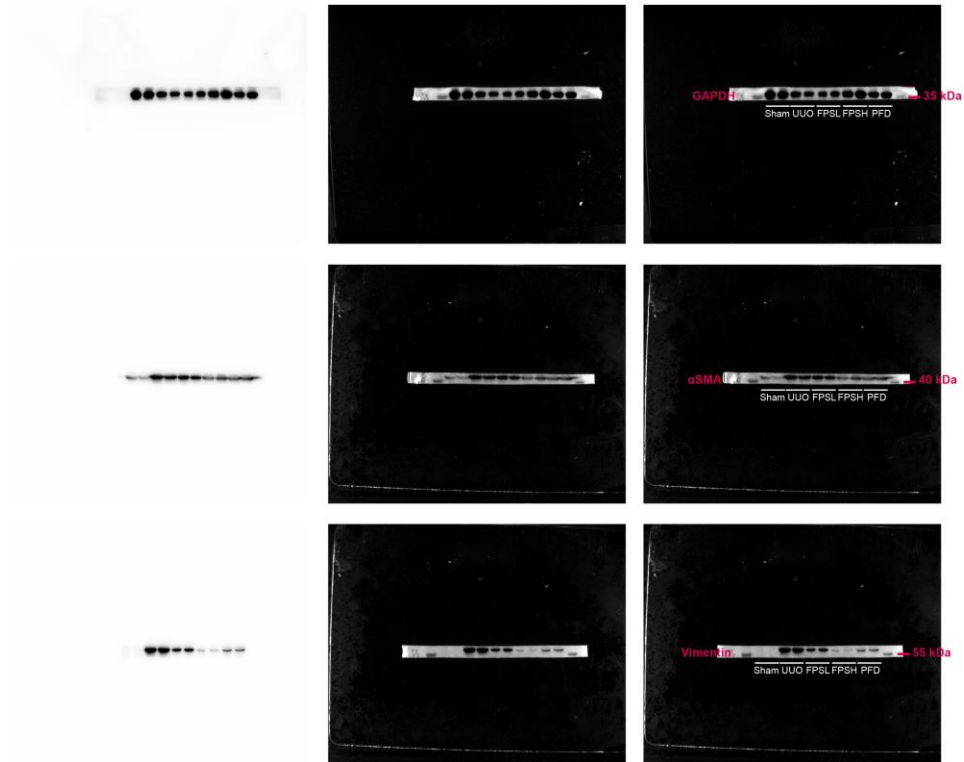

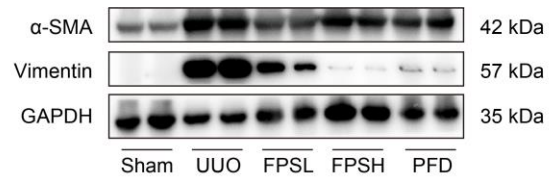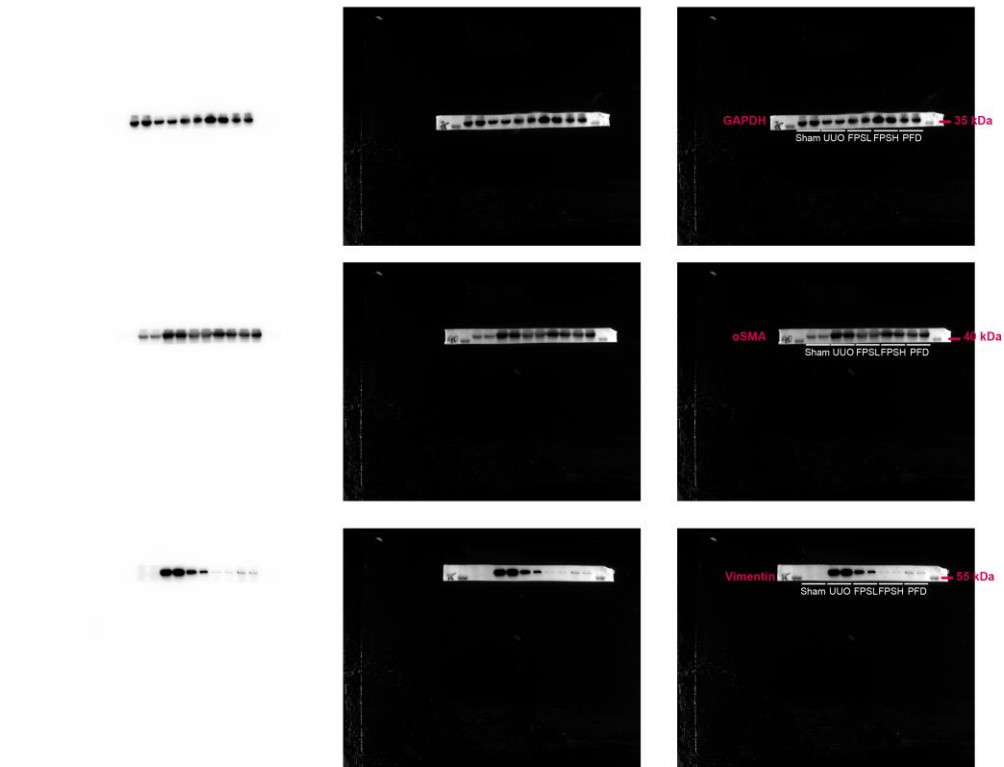

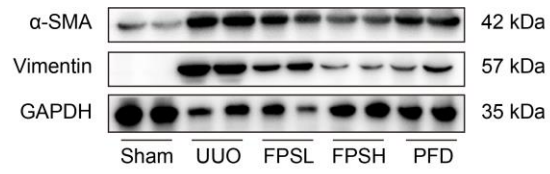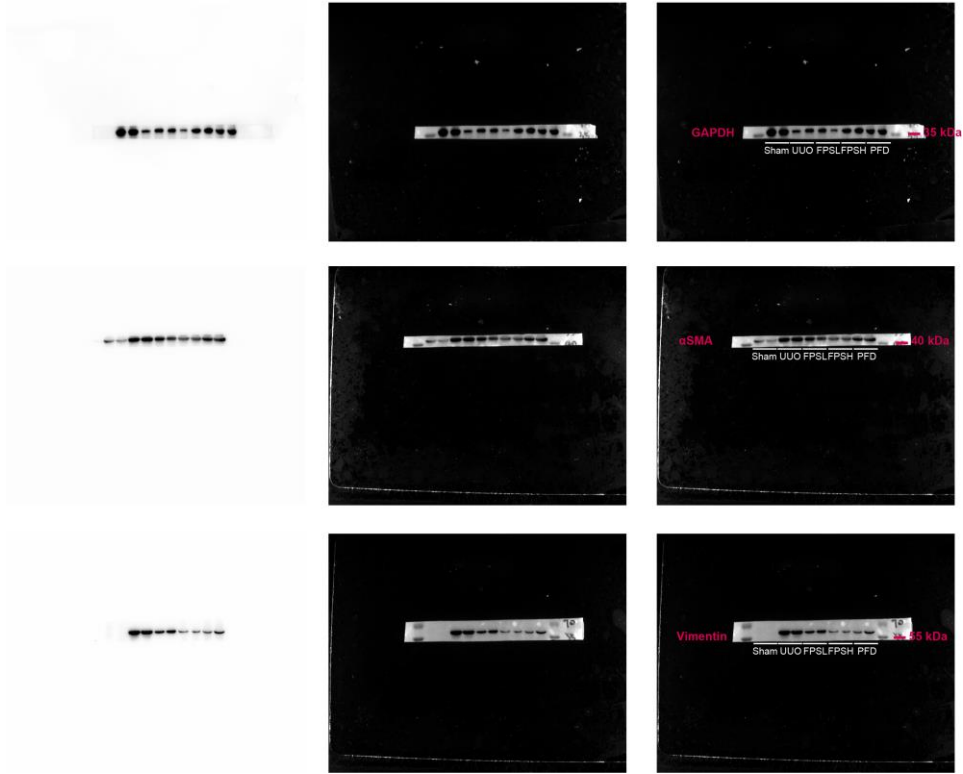

Supplement: d6fo00785f1.pdf [file d6fo00785f1.pdf]
